# Supplementary material for: Hematopoietic stem cell-derived fibrocytes as targets and tools for cancer therapy: mechanisms and therapeutic implications
Source: Research Square preprint supplement (doi:10.21203/rs.3.rs-1438771/v2), 2022-04-07
Supplement: Supplementary file 2 [file e39b2a18e5bf8ae9e728736d.xlsx]

## Sheet: Supplementary Table S5
Supplementary Table S5. Gene Sets for GSEA analysis
Gene Set Name	Gene Set Size	Gene Set Source	Genes
Zhang-CAF vs NF upregulated	423	Reference 10	A2M, ABI3BP, ACTN1, ACTN4, ADAM19, ADAM21P1, ADAMTS2, ADAMTS9, ADM, ADRB3, AEBP1, AGXT2L2, ALDH1B1, AMZ1, ANGPTL2, ANK3, ANKRD1, ANXA8, APOL3, AREG, ARMCX1, ARSJ, ATP10A, BDNF, BGN, BHLHB2, BMP5, BPY2C, C18orf56, C1orf115, C1R, C1S, C8orf4, CACNA2D3, CADM1, CALML5, CALU, CARKD, CBX7, CCBE1, CCDC80, CCL11, CCND1, CD14, CD248, CDH1, CDH13, CDK1, CENPL, CF1, CHRNA1, CHSY3, CKAP4, CKS2, CLDN1, CLDN11…
Dupont-induced by YAP	68	Reference 46	AMOTL2, ANKRD1, ANLN, ARHGAP29, AXL, BICC1, BIRC5, CCRN4L, CDC20, CDK6, CDKN2C, CENPF, COL4A3, CRIM1, CTGF, CYR61, DAB2, DDAH1, ASAP1, DUSP1, DUT, ECT2, EMP2, ETV5, FGF2, FLNA, FSCN1, FSTL1, GADD45B, GAS2L3, GAS6, GGH, GKAP1, GLIS2, GLS, HEXB, HMMR, AGFG2, ITGB2, ITGB5, LHFP, MACF1, MARCKS, MDFIC, MSRB3, MYO1C, NDRG1, PDLIM2, PHGDH, PMP22, SCHIP1, SDPR, SERPINE1, SERTAD4, SFRS2IP, SGK1, SH2D4A, S…
Zhang-induced by YAP	1265	Reference 47	SV2B, ALPP, SPARCL1, DMC1, KRT34, TM4SF20, ZNF385B, ITGB2, OLR1, ATRNL1, KBTBD10, ARHGAP29, FBLN5, THBS1, RNF165, CLIC5, GRIN2A, SIDT1, PRSS7, STXBP6, ARGLU1, ANKRD1, PCTK3, CBLB, CTGF, KCNT2, TOX2, FANCB, CENPM, ADAMTS1, MIER3, TUBE1, FANCD2, PLCB4, INHBA, SFTA1P, SERTAD4, LOC100129406, MYOCD, DENND5B, MATN3, KNG1, TRIO, CCDC18, NRAP, ORC1L, ZBED2, DAB2, BCAR4, GJA5, HSD3B1, FRY, TGM2, TMEM171, …
Zhang-induced by YAP and TAZ	619	Reference 47	KRT34, STXBP6, NAV3, DIAPH3, INHBA, BDNF, SERTAD4, OLR1, PTGS2, WDR69, HSD3B1, CTGF, LRRC8C, THBS1, ETV5, IGFBP3, ORC1L, TGM2, ANKRD1, RECQL4, SERPINE1, DEPDC1B, CCNA2, C14orf145, CENPM, SERPINE2, TMEFF2, DDAH1, TMEM171, CDC25C, MCM10, CDC2, CST6, ADAMTS1, RRM2, AKAP12, NT5E, CDC25A, RAD51AP1, ITGB2, RAD51, CDC6, CCDC18, C18orf24, SHCBP1, KIF14, PLCB4, CNN3, UHRF1, TBXA2R, ZWINT, ZBED2, EXO1, SLI…
Zhang -TEAD dependent YAP and TAZ	33	Reference 47	ABHD2, BCAR4, BDNF, CHST3, CTGF, CYR61, DAB2, FMN2, FRY, GGH, GJA5, ITGB2, LHFP, LIFR, MFAP5, OLR1, PARVA, PDGFRL, PMP22, PRR16, PRSS23, PTGS2, PXDN, RASAL2, SCARA3, SMARCA1, SPARC, SPRED1, STXBP6, SYDE2, TGFB2, TMEM56, ZNF738
Zhang-TEAD dependent YAP	23	Reference 47	AAAS, ALPP, BCHE, CAPN6, DNM3, FBLN5, FGF9, FLRT2, GPR161, KRT4, LOX, MAGED1, NDRG1, PCTK3, PIK3C2B, PROS1, REEP1, RNF150, SLC2A3, SV2B, TM4SF20, TMEM47, VLDLR
Dong- induced by YAP in liver	1064	Reference 48	REX3, FGFBP1, FMO3, SPINK3, GPC3, CTGF, HAO3, BICC1, 1810010H24RIK, DDR1, FXYD3, PEG3, CD36, RRAGD, SOX4, 1700110N18RIK, SFTPD, SLC25A4, ANKRD1, PSCA, AKR1B7, RPS9, ABCB1A, OSBPL3, AFP, BC055107, EFEMP1, SLC25A24, VNN1, PKD2, LOC434420, AHNAK, GNAI1, CRYAB, FMO2, S100A11, TINAG, SERPINB6A, PLSCR2, ANXA5, H19, ID1, NFKBIE, OMD, CALML4, 4930533K18RIK, D17H6S56E-5, FADS3, JAG1, SERPINB6B, NID1, EMP1…
Zhao-induced by YAP in 3T3	1583	Reference 49	STXBP6, SV2B, ALPP, DIAPH3, SCARA3, SPARCL1, BDNF, DMC1, KRT34, TM4SF20, STXBP6, ZNF533, ITGB2, OLR1, ATRNL1, hCG_2032978, KBTBD10, ARHGAP29, FBLN5, ITGB2, THBS1, RNF165, SMARCA1, CLIC5, SIDT1, PRSS7, STXBP6, FLJ10154, LRRC8C, ANKRD1, PCTK3, CBLB, KIF23, CTGF, KCNT2, TOX2, ADAMTS1, THBS1, FANCB, CENPM, ADAMTS1, THBS1, MIER3, C14orf145, PLCB4, TUBE1, LOC57400, TGM2, FANCD2, PLCB4, INHBA, SERTAD4, …
Zhao-YAP common MCF10 and 3T3	70	Reference 49	CTGF, PTGS2, SERPINE1, AXL, REEP1, PRSS23, FGF2, CYR61, CENPA, ETV5, DUSP6, DTL, C6orf173, CCND1, PLA2G4A, EGR1, SPC25, INHBA, TMEPAI, PLAC8, FEN1, ALCAM, FLRT2, TOP3B, HMGA2, SMC2, RFFL, NUP62, TRIB3, SOD2, PDK4, PNRC1, METTL7A, SERPINA3, GPNMB, SEPP1, CXCL2, AQP3, TCF4, TNFAIP3, RYR1, ST6GAL1, HIST1H2BD, SAA2, GBP2, MICALL2, DCN, H2BFS, FOXO3, KLF9, NFKBIZ, HIST3H2A, FBXO32, HIST1H2BG, NCOA7, Z…
